# Supplementary material
Source: Research Square preprint supplement (doi:10.21203/rs.3.rs-10265679/v1)
Supplement: Supplementary file 1 [file 3caa32bcf67b929bf0e4fb63.docx]

**Table 1. Characteristics of included randomized and cluster-randomized trials evaluating professionally applied topical fluoride agents for caries prevention in children and adolescents**

| **Study (Year)** | **Country** | **Design** | **Population / dentition** | **Age at baseline** | **Sample size analysed, n (IG/CG)** | **Intervention** | **Comparator** | **Follow-up (months)** | **Outcome (Index)** |
| --- | --- | --- | --- | --- | --- | --- | --- | --- | --- |
| Agarwal et al., 2022 [19] | India | Cluster RCT | Preschool children | 3-4 y | 392 (196/196) | FV | Placebo | 36 | Caries increment (ICDAS) |
| Agouropoulos et al., 2014 [20] | Greece | RCT | Preschool children | 2-5 y | 328 (174/154) | FV + OHE + FTP | Placebo | 24 | Caries increment (dmfs) |
| Agrawal et al., 2011 [21] | India | Cluster RCT | Mixed dentition; high-caries-risk children | 9-16 y | 257 (130/127) | APF gel + OHE | OHE | 12 | Caries increment (DMFT/DMFS) |
| Anderson et al., 2016 [22] | Sweden | Cluster RCT | High-risk toddlers | 1 y | 2536 (1231/1305) | FV + OHE | Control | 24 | Caries increment (ICDAS) |
| Arruda et al., 2012 [23] | Brazil | RCT | Children/adolescents; permanent dentition | 6-14 y | 210 (113/97) | FV | Placebo | 12 | Caries increment (ICDAS/DFS) |
| Brambilla et al., 1997 [24] | Italy | RCT | Children; first permanent molars | 6 y | 248 (128/120) | AmF | Placebo | 60 | Caries incidence (DMFT/FPM) |
| Bravo et al., 1997/2005 [25] | Spain | Cluster RCT | Children; first permanent molars | 6-8 y | 314 (FS/FV/control: 100/98/116) | FS; FV | Control | 24; 108 | Caries increment (DMFS/FPM) |
| Chestnutt et al., 2017 [26] | UK | RCT | Children; first permanent molars | 6-7 y | 835 (417/418) | FS | Active comparator | 36 | Caries incidence (ICDAS) |
| Gugwad et al., 2011 [27] | India | RCT | Mixed dentition children | 6-7 y | 211 (106/105) | FV | Control | 12 | Caries increment (deft/DMFT/DMFS) |
| Hardman et al., 2007 [28] | UK | Cluster RCT | Mixed dentition children | 6-8 y | 664 (334/330) | FV | Control | 26 | Caries increment (dmfs/DMFS) |
| Holm et al., 1984 [29] | Sweden | RCT | Children; first permanent molars | 5 y 9 mo | 109 children (50/59); 381 molars (166/215) | FV | Control | 24 | Caries incidence (FPM) |
| Honkala et al., 2015 [30] | Kuwait | Split-mouth RCT | Children; primary molars | 4-5 y | 106 children; 267 matched pairs | FS | Active comparator | 12 | Caries incidence (ICDAS) |
| Jiang et al., 2005 [31] | China | Cluster RCT | Children; first permanent molars | 6-7 y | 612 (APF foam/APF gel/control:191/200/221) | APF foam; APF gel | Control | 24 | Caries increment (DMFS/FPM) |
| Jiang et al., 2014 [32] | Hong Kong | RCT | Preschool children | 8-23 mo | 415 (Control/OHE/FV + OHE: 134/144/137) | FV + OHE | OHE | 24 | Caries increment and incidence |
| Johnston et al., 1995 [33] | Canada | RCT | Mixed dentition children | 6-7;10-11 y | 329 (frequency: 168/161; prophylaxis: 182/147) | APF gel | Active comparator | 36 | Caries increment (defs/DMFS) |
| Khairnar et al., 2026 [34] | India | RCT | Children; first permanent molars | 6-8 y | 84 children; 330 teeth (163/167) | FV | Active comparator | 24 | Caries incidence (ICDAS) |
| Lam et al., 2024 [35] | Hong Kong | RCT | Preschool children; primary second molars | 3-4 y | 479 (NaFV/GIS: 254/225) | FV | Active comparator | 18-24 | Caries incidence (ICDAS) |
| Latifi-Xhemajli et al., 2019[36] | Kosovo | RCT | Preschool children | Mean 21 mo | 427 (218/209) | FV | Control | 24 | Caries increment and incidence |
| Lawrence et al., 2008 [37] | Canada | Cluster RCT | Preschool children | 6 mo-5 y | 1275 (915/360) | FV + OHE | OHE | 24 | Caries increment and incidence |
| Linčir et al., 1993 [38] | Croatia | RCT | Preschool children | 3-4 y | 199 (55/53/61/30) | AmF | Placebo | 24 | Caries increment (dmft/dmfs) |
| Liu et al., 2012 [39] | Hong Kong | RCT | Children; first permanent molars | Mean 9.1 y | 485 (FS/FV/SDF/control: 121/116/121/124) | FS; FV; SDF | Placebo | 24 | Caries incidence (ICDAS) |
| Manchanda et al., 2024 [40] | Hong Kong | RCT | Preschool children | 3-4 y | 135 (45/45/45) | FV | Active comparator | 24 | Caries increment and incidence |
| Mellberg et al., 1978 [41] | USA | RCT | Permanent dentition children | 9-12 y | 1235 (255/227; 193/184; 190/186)* | APF gel | Control | 12 | Caries increment (DMFS) |
| Milsom et al., 2011 [42] | UK | Cluster RCT | Children; first permanent molars | 7-8 y | 2967 (1473/1494) | FV | Control | 36 | Caries increment (DFS/DFT/FPM) |
| Muñoz-Millán et al., 2018 [43] | Chile | RCT | Preschool children | 2-3 y | 275 randomized (131/144); 189 completed (89/100) | FV | Placebo | 24 | Caries increment and incidence |
| Oliveira et al., 2014 [44] | Brazil | RCT | Preschool children | 1-4 y | 181 (89/92) | FV | Placebo | 24 | Caries increment and incidence |
| Seppä et al., 1995 [45] | Finland | RCT | Permanent dentition children | 12-13 y | 254 (125/129) | FV | Active comparator | 36 | Caries increment (DMFS) |
| Sirivichayakul et al., 2023 [46] | Thailand | RCT | Primary dentition; | 4-6 y | 155 (placebo/FV/SDF: 52/53/50) | FV; SDF | Placebo | 18 | Radiographic caries outcome |
| Sköld et al., 2005 [47] | Sweden | RCT | Permanent dentition adolescents | 13-16 y | 758 (190/186/201/181) | FV | Control | 36 | Radiographic caries outcome |
| Slade et al., 2011 [48] | Australia | Cluster RCT | Preschool children | 18-47 mo | 543 (281/262) | FV + OHE | Control | 24 | Caries increment and incidence |
| Souza et al., 2021 [49] | Brazil | RCT | Children; permanent smooth surfaces | 6-8 y | 60 (TiF4/NaF/placebo: 20/20/20) | FV | Placebo | 18 | QLF-based lesion progression |
| Tickle et al., 2017 [50] | UK | RCT | Preschool children | 2-3 y | 1096 (549/547) | FV + OHE + FTP | OHE | 36 | Caries increment and incidence |
| Uhlen-Strand et al., 2024 [51] | Norway | Split-mouth RCT | Children; first permanent molars | 6-10 y | 369 children; split-mouth tooth-pair design | FS | Active comparator | 36 | Binary caries outcome |
| van Rijkom et al., 2004 [52] | Netherlands | RCT | Mixed dentition children | 4.5-6.5 y | 732 (372/360) | NaF gel | Placebo | 48 | Caries increment (D3MFS/d3mfs) |
| Wang et al., 2022 [53] | China | Cluster RCT | Children; first permanent molars | 6-7 y | 5005 (2385/2620) | FV + OHE | OHE | 24 | Caries increment and incidence |
| Weinstein et al., 2009 [54] | USA | RCT | Preschool children | 36-71 mo | 600 (294/306) | FV | Active comparator | 36 | Caries increment (primary tooth surfaces) |
| Weintraub et al., 2006 [55] | USA | RCT | Preschool children | 6-44 mo | 376 (annualV/biannual FV/control:24/126/126) | FV + OHE | OHE | 24 | Caries increment and incidence |
| Zheng et al., 2023 [56] | Hong Kong | RCT | Primary dentition; upper anterior teeth | 3-4 y | 434 (209/225) | SDF | Active comparator | 12 | Caries incidence (dmfs-based) |
| Zheng et al., 2026 [57] | Hong Kong | RCT | Primary dentition; upper anterior teeth | 3-4 y | 621 (307/314) | SDF | Active comparator | 30 | Caries incidence (dmfs-based) |
| Zimmer et al., 1999 [58] | Germany | RCT | Permanent dentition schoolchildren | Age NR | 253 (110/143) | FV | Control | 24 | Caries increment (D1/2MFS and D3/4MFS) |

**Abbreviations:** RCT, randomized controlled trial; IG, intervention group; CG, control group; FV, fluoride varnish; APF, acidulated phosphate fluoride; NaF, sodium fluoride; SDF, silver diamine fluoride; AmF, amine fluoride; FS, fissure sealant; OHE, oral health education; FTP, fluoride toothpaste; FPM, first permanent molar; dmft, decayed, missing, and filled teeth in primary dentition; dmfs, decayed, missing, and filled surfaces in primary dentition; DMFT, decayed, missing, and filled teeth in permanent dentition; DMFS, decayed, missing, and filled surfaces in permanent dentition; DFS, decayed and filled surfaces; ICDAS, International Caries Detection and Assessment System; QLF, quantitative light-induced fluorescence; NR, not reported.

**Footnote:** Values represent analysed sample sizes at the outcome time point used for synthesis wherever available. Randomized sample sizes are shown only when analysed numbers were unavailable and are marked with an asterisk. OHE was used as a standard abbreviation for oral health education, counselling, toothbrushing advice, parent advice, health promotion, and similar behavioural components. Comparator terminology was standardized as Placebo, Control, OHE, Usual care/control, No treatment/control, or Active comparator according to the original trial design.
