# Supplementary material
Source: Research Square preprint supplement (doi:10.21203/rs.3.rs-10265679/v1)
Supplement: Supplementary file 3 [file 560c38d8ddbcc13ee8dfbf96.docx]

| **Abbreviation** | **Full form** |
| --- | --- |
| ADA | American Dental Association |
| AmF | Amine fluoride |
| APF | Acidulated phosphate fluoride |
| APF foam | Acidulated phosphate fluoride foam |
| APF gel | Acidulated phosphate fluoride gel |
| CG | Control group |
| CI | Confidence interval |
| CINeMA | Confidence in Network Meta-Analysis |
| DFS | Decayed and filled surfaces |
| DFT | Decayed and filled teeth |
| DMFS | Decayed, missing, and filled surfaces in permanent dentition |
| DMFT | Decayed, missing, and filled teeth in permanent dentition |
| dmfs | Decayed, missing, and filled surfaces in primary dentition |
| dmft | Decayed, missing, and filled teeth in primary dentition |
| ECC | Early childhood caries |
| FPM | First permanent molar |
| FS | Fissure sealant |
| FTP | Fluoride toothpaste |
| FV | Fluoride varnish |
| GRADE | Grading of Recommendations Assessment, Development and Evaluation |
| ICDAS | International Caries Detection and Assessment System |
| IG | Intervention group |
| ITT | Intention-to-treat |
| NaF | Sodium fluoride |
| NaF gel | Sodium fluoride gel |
| NMA | Network meta-analysis |
| OHE | Oral health education |
| OHI | Oral hygiene instruction |
| OR | Odds ratio |
| PRISMA | Preferred Reporting Items for Systematic Reviews and Meta-Analyses |
| QLF | Quantitative light-induced fluorescence |
| RCT | Randomized controlled trial |
| RoB 2 | Cochrane risk-of-bias tool for randomized trials |
| RR | Risk ratio |
| SD | Standard deviation |
| SDF | Silver diamine fluoride |
| SE | Standard error |
| SMD | Standardized mean difference |
| TiF₄ | Titanium tetrafluoride |
| WHO | World Health Organization |
